# Supplementary material for: Improved Cervical Lymph Node Characterization among Patients with Head and Neck Squamous Cell Carcinoma Using MR Texture Analysis Compared to Traditional FDG-PET/MR Features Alone
Source: MDPI journal article supplement (doi:10.3390/diagnostics14010071), 2023-12-28
Supplement: s1 [file s1]

**Table S1. Comparison of STIR texture features between all benign and malignant lymph nodes.** Note.—All values expressed as mean  $\pm$  standard deviation. The significance threshold for difference was set at a P value of less than 0.05, according to an independent t-test. \* indicates statistically significant.

| Texture Feature | Benign Nodes (n=68)  | Malignant Nodes (n=41) | P Value |
|-----------------|----------------------|------------------------|---------|
| Histogram       |                      |                        |         |
| Skewness        | -0.33 $\pm$ 0.43     | -0.20 $\pm$ 0.56       | .15     |
| Kurtosis        | 3.08 $\pm$ 0.93      | 3.61 $\pm$ 1.11        | .0081*  |
| Entropy log10   | 1.55 $\pm$ 0.05      | 1.57 $\pm$ 0.07        | 0.2     |
| Entropy log2    | 5.15 $\pm$ 0.17      | 5.20 $\pm$ 0.22        | 0.2     |
| Energy          | 0.03 $\pm$ 0.005     | 0.03 $\pm$ 0.01        | 0.88    |
| Shape           |                      |                        |         |
| Volume (mL)     | 0.30 $\pm$ 0.18      | 1.51 $\pm$ 1.82        | <.0001* |
| Volume (# vx)   | 115.07 $\pm$ 66.10   | 578.71 $\pm$ 751.81    | <.0001* |
| Sphericity      | 0.35 $\pm$ 0.39      | 0.48 $\pm$ 0.30        | 0.08    |
| Compacity       | 0.34 $\pm$ 0.39      | 0.78 $\pm$ 0.57        | <.0001* |
| GLCM            |                      |                        |         |
| Homogeneity     | 0.15 $\pm$ 0.04      | 0.19 $\pm$ 0.04        | <.0001* |
| Energy          | 0.02 $\pm$ 0.01      | 0.01 $\pm$ 0.01        | <.0001* |
| Texture Feature | Benign Nodes (n=68)  | Malignant Nodes (n=41) | P value |
| Histogram       |                      |                        |         |
| Skewness        | -0.33 $\pm$ 0.43     | -0.20 $\pm$ 0.56       | .15     |
| Kurtosis        | 3.08 $\pm$ 0.93      | 3.61 $\pm$ 1.11        | .0081*  |
| Entropy log10   | 1.55 $\pm$ 0.05      | 1.57 $\pm$ 0.07        | 0.2     |
| Entropy log2    | 5.15 $\pm$ 0.17      | 5.20 $\pm$ 0.22        | 0.2     |
| Energy          | 0.03 $\pm$ 0.005     | 0.03 $\pm$ 0.01        | 0.88    |
| Shape           |                      |                        |         |
| Volume (mL)     | 0.30 $\pm$ 0.18      | 1.51 $\pm$ 1.82        | <.0001* |
| Volume (# vx)   | 115.07 $\pm$ 66.10   | 578.71 $\pm$ 751.81    | <.0001* |
| Sphericity      | 0.35 $\pm$ 0.39      | 0.48 $\pm$ 0.30        | 0.08    |
| Compacity       | 0.34 $\pm$ 0.39      | 0.78 $\pm$ 0.57        | <.0001* |
| GLCM            |                      |                        |         |
| Homogeneity     | 0.15 $\pm$ 0.04      | 0.19 $\pm$ 0.04        | <.0001* |
| Energy          | 0.02 $\pm$ 0.01      | 0.01 $\pm$ 0.01        | <.0001* |
| Contrast        | 315.18 $\pm$ 170.67  | 189.09 $\pm$ 105.12    | <.0001* |
| Correlation     | 0.09 $\pm$ 0.22      | 0.23 $\pm$ 0.17        | .0007*  |
| Entropy log10   | 1.93 $\pm$ 0.23      | 2.39 $\pm$ 0.31        | <.0001* |
| Entropy log2    | 6.40 $\pm$ 0.76      | 7.92 $\pm$ 1.02        | <.0001* |
| Dissimilarity   | 13.62 $\pm$ 3.97     | 10.26 $\pm$ 3.08       | <.0001* |
| GLRLM           |                      |                        |         |
| SRE             | 0.99 $\pm$ 0.01      | 0.98 $\pm$ 0.01        | <.0001* |
| LRE             | 1.05 $\pm$ 0.03      | 1.09 $\pm$ 0.04        | <.0001* |
| LGRE            | 0.02 $\pm$ 0.01      | 0.01 $\pm$ 0.01        | <.0001* |
| HGRE            | 1501.66 $\pm$ 312.95 | 1324.09 $\pm$ 351.63   | .007*   |
| SRLGE           | 0.02 $\pm$ 0.01      | 0.01 $\pm$ 0.01        | <.0001* |
| SRHGE           | 1480.56 $\pm$ 304.67 | 1297.78 $\pm$ 343.70   | .005*   |
| LRLGE           | 0.02 $\pm$ 0.01      | 0.01 $\pm$ 0.01        | <.0001* |
| LRHGE           | 1589.99 $\pm$ 351.19 | 1437.97 $\pm$ 392.36   | .04*    |
| GLNU            | 3.74 $\pm$ 2.50      | 20.17 $\pm$ 28.57      | <.0001* |
| RLNU            | 108.60 $\pm$ 58.76   | 517.99 $\pm$ 648.37    | <.0001* |
| RP              | 0.98 $\pm$ 0.01      | 0.97 $\pm$ 0.01        | <.0001* |
| NGLDM           |                      |                        |         |
